# Supplementary material for: Genetic analysis of the Drosophila ESCRT-III complex protein, VPS24, reveals a novel function in lysosome homeostasis
Source: PubMed Central journal article supplement (PMC8101729; doi:10.1371/journal.pone.0251184), 2021-05-06
Supplement: pone.0251184.s012.pdf [file pone.0251184.s012.pdf]

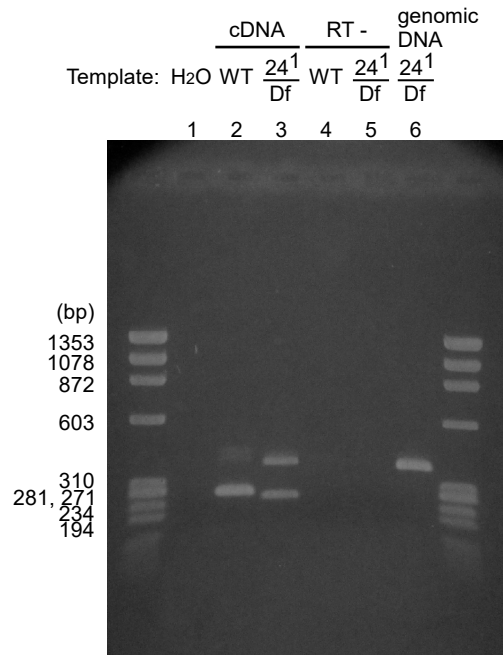

**Original image used to generate Figure S2 Panel A**

Method used to capture the image: Digital camera through a filter for ethidium bromide gels

Samples: PCR products using indicated materials as a template.

RT- : cDNA synthesis reaction without reverse transcriptase (RT).

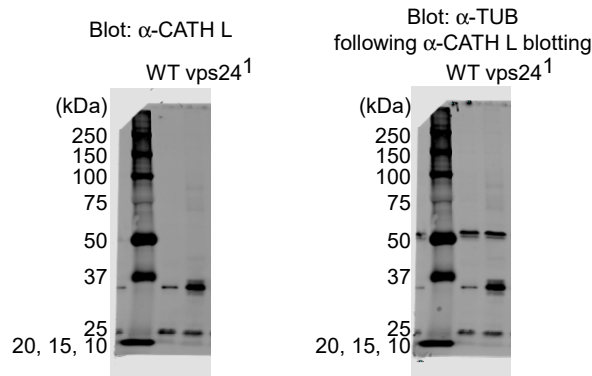

**Original images used to generate Figure 7 Panel A**

Method used to capture the image: LI-COR OdysseyCLx imager

Samples: Whole fly lysate

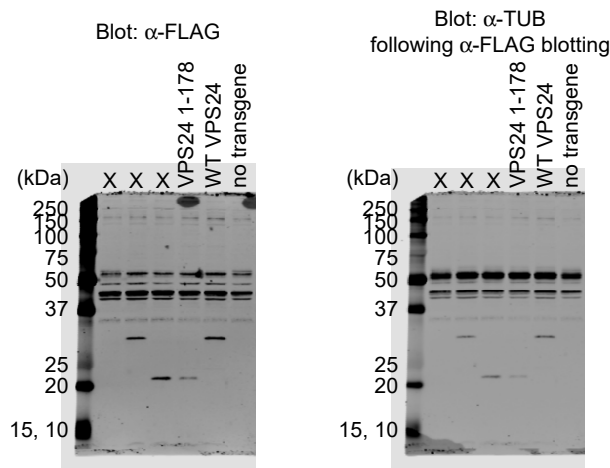

**Original images used to generate Figure 11 Panel B**

Method used to capture the image: LI-COR OdysseyCLx imager

Samples: Lysate prepared from fly heads
